# Supplementary material
Source: PubMed Central journal article supplement (PMC3294482)
Supplement: supp_78.5.1544_AEM-AEM06466-11-s01.pdf [file supp_78.5.1544_AEM-AEM06466-11-s01.pdf]

1 **SUPPLEMENTARY MATERIAL**

2

3 **SUPPLEMENTARY FIGURE 1.** Ethidium bromide-stained pulse field gel of digested  
4 genomic DNA of *Diplosphaera colotermitum* strain TAV2. Numbers above lanes refer to: 1)  
5 TAV2 genomic DNA digested with the restriction enzyme *Pme1*; 2) low range pulse field maker,  
6 and 3) lambda ladder pulse field marker.

7

8 **SUPPLEMENTARY FIGURE 2.** Southern hybridizations of the 16S rRNA gene of  
9 *Diplosphaera colotermitum* strain TAV2-digested genomic DNA. Numbers above lanes refer to  
10 genomic DNA digested with the following restriction enzymes: 1) *ApaI*; 2) *HaeII*; 3) *SmaI*. Lane  
11 4 is a DIG-labeled  $\lambda$  molecular marker digested with *HindIII*.
