# Supplementary material
Source: PubMed Central journal article supplement (PMC3294482)

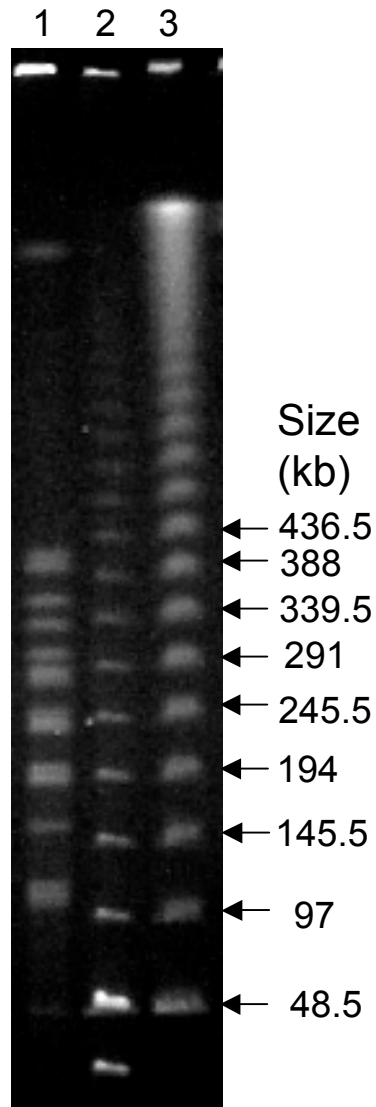

Supplement: supp_78.5.1544_AEM-AEM06466-11-s02.pdf [file supp_78.5.1544_AEM-AEM06466-11-s02.pdf]

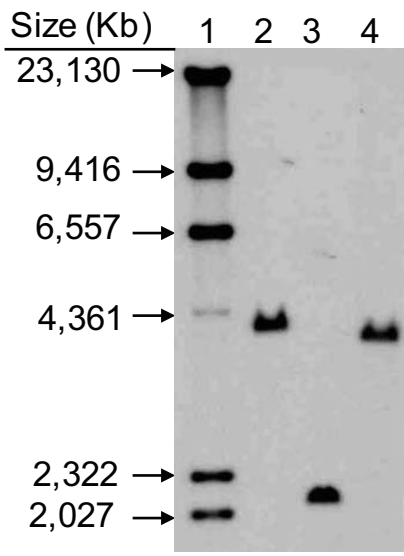

Supplement: supp_78.5.1544_AEM-AEM06466-11-s03.pdf [file supp_78.5.1544_AEM-AEM06466-11-s03.pdf]
